# Supplementary material for: Aldehyde-alcohol dehydrogenase undergoes structural transition to form extended spirosomes for substrate channeling
Source: PubMed Central journal article supplement (PMC7286902; doi:10.1038/s42003-020-1030-1), 2020-06-10
Supplement: 42003_2020_1030_MOESM1_ESM.pdf [file 42003_2020_1030_MOESM1_ESM.pdf]

# Supplementary Figure 1

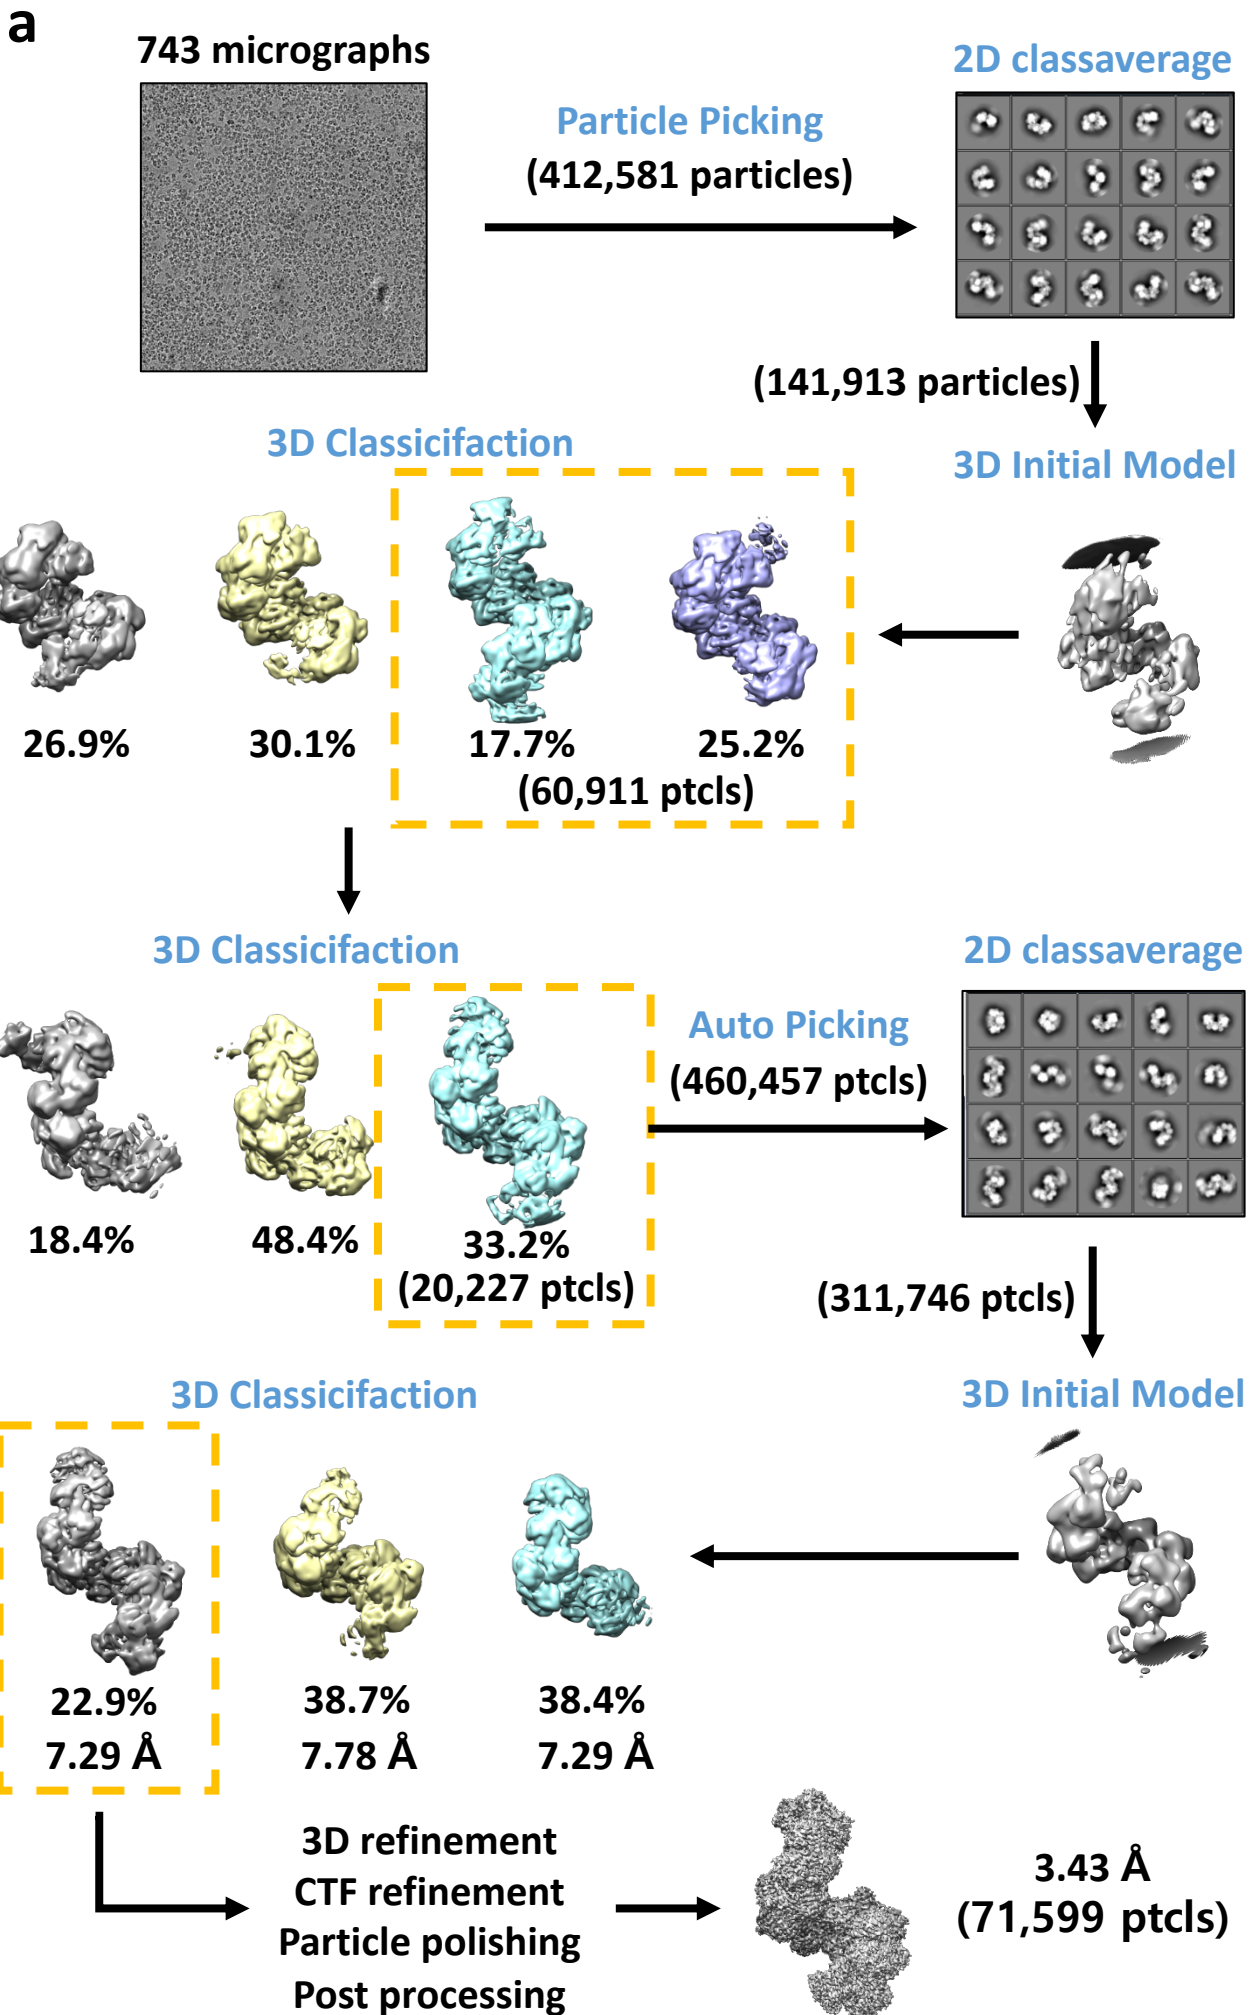

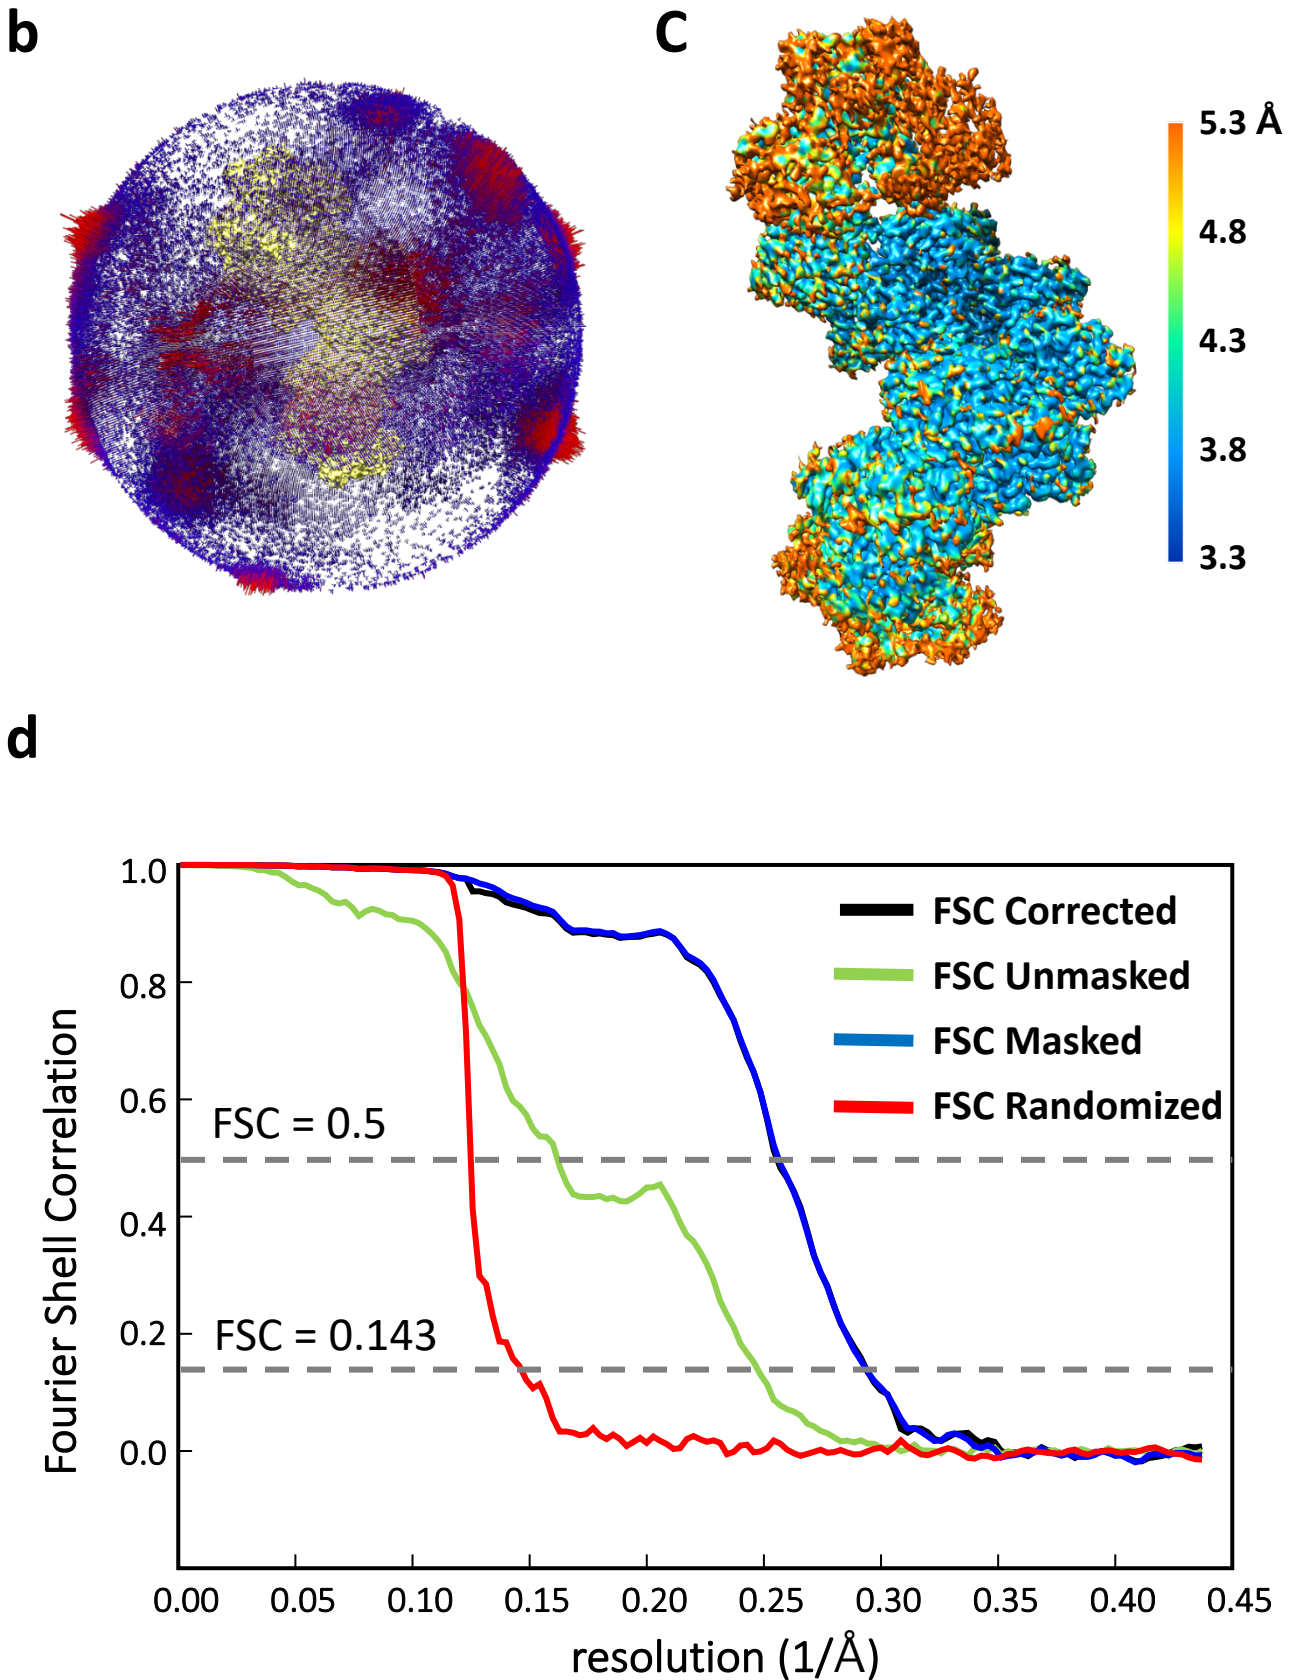

### Supplementary Figure 1. Cryo-EM imaging process

**a.** A flow chart for the cryo-EM image processing. **b.** Euler angle distribution of the particles used for the final cryo-EM structure. **c.** A local resolution heat map of AdhE on the cryo-EM map. The local resolution was estimated using Relion3.0<sup>19</sup>. The color code indicates local resolutions. **d.** FSC curves calculated show the resolution of 3.43 Å and 3.90 Å by an FSC coefficient criterion of 0.143 and 0.5 respectively.

## Supplementary Figure 2

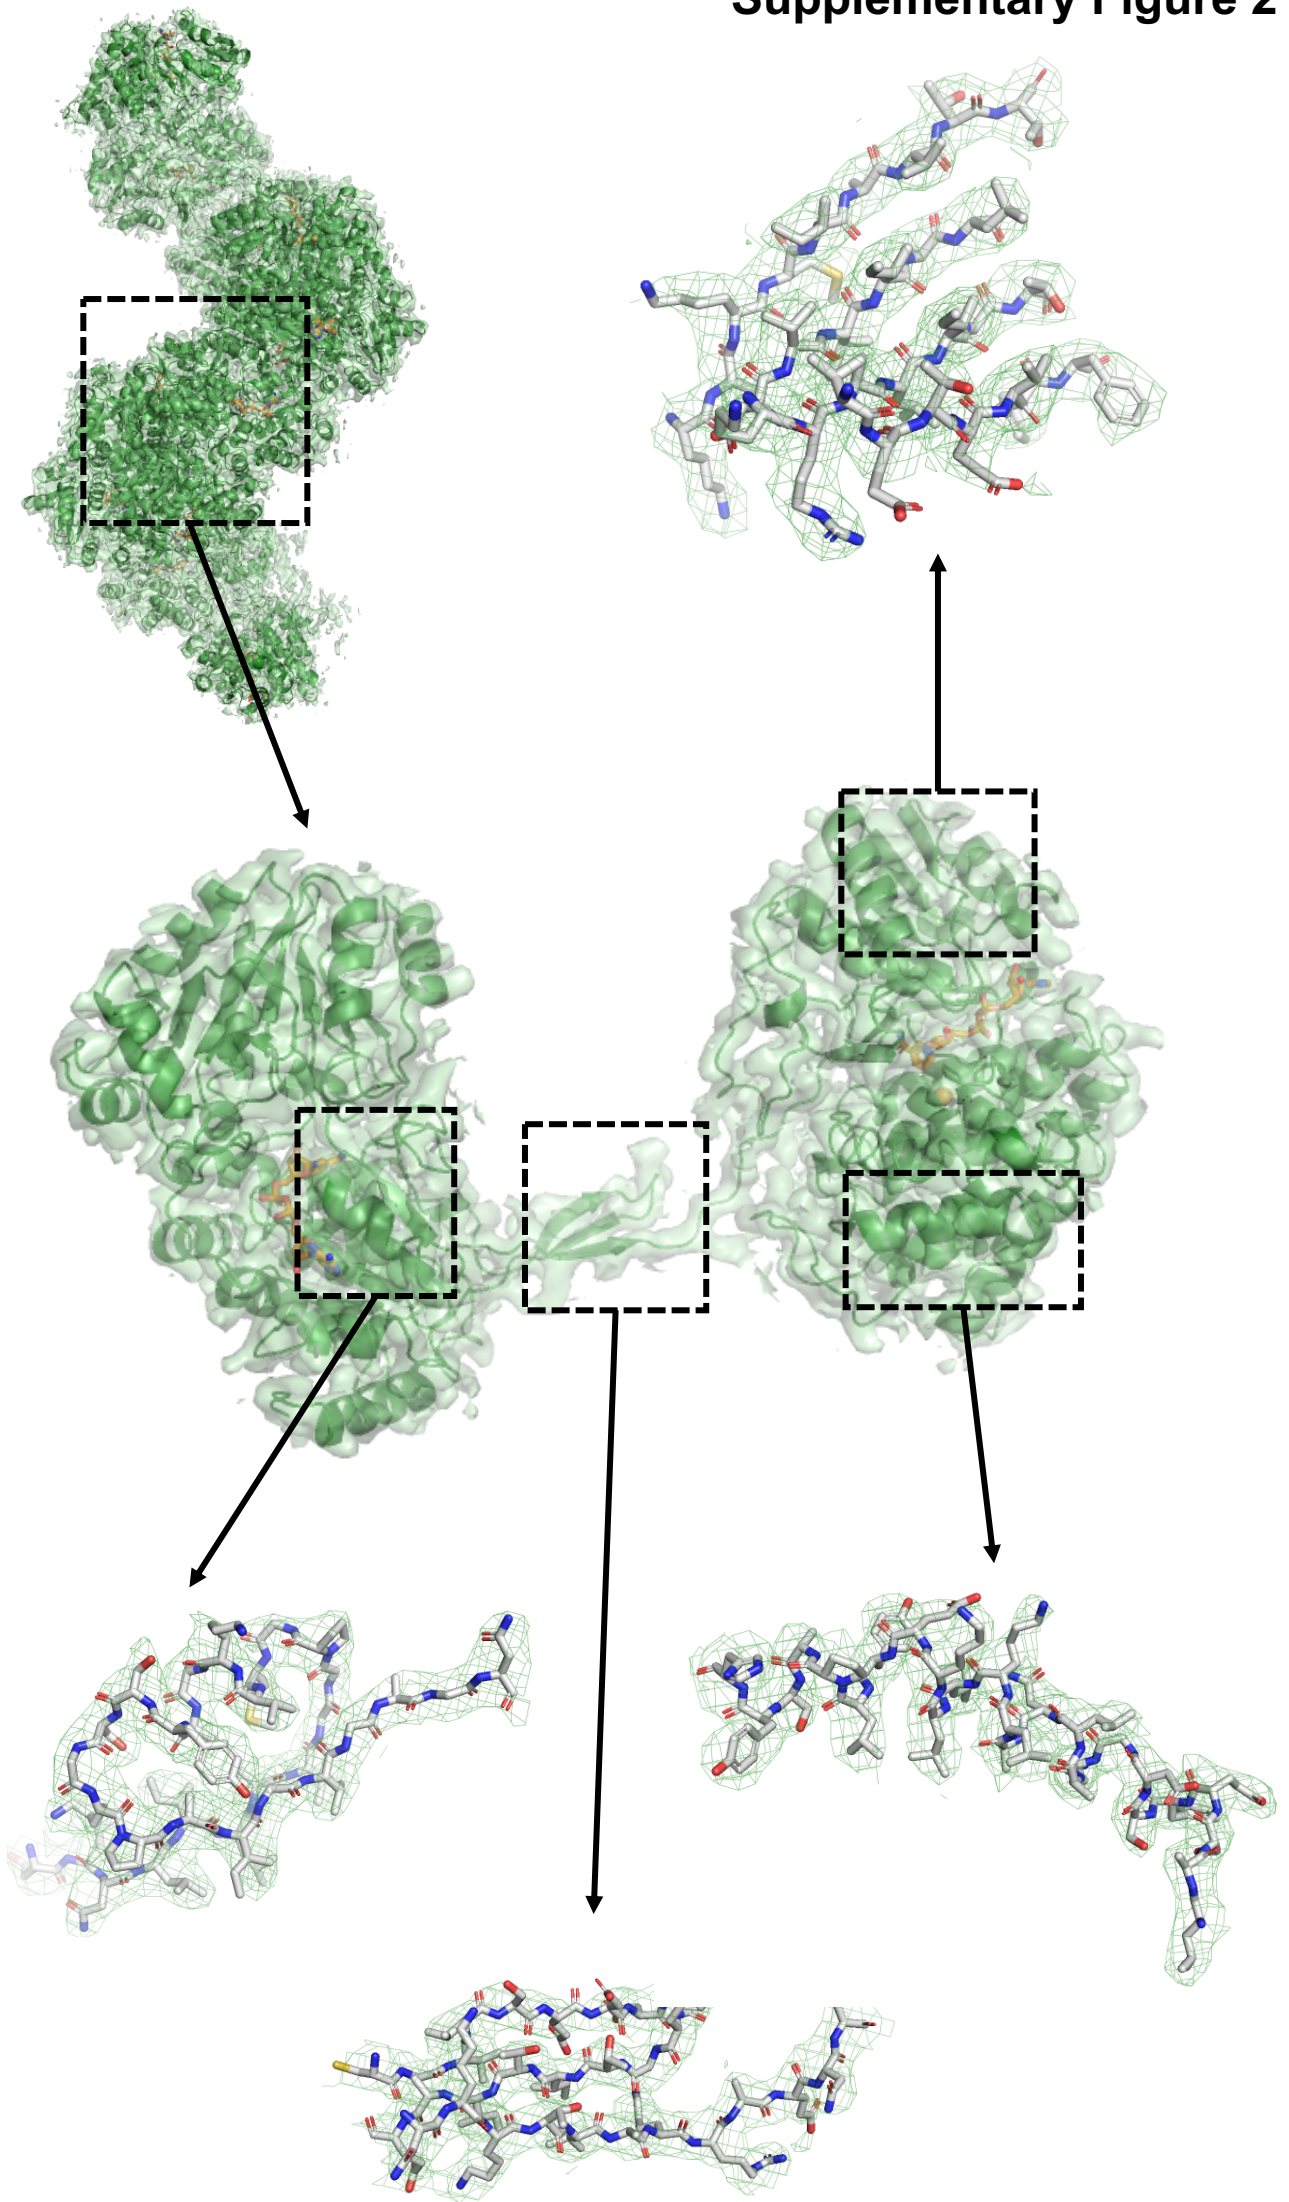

### Supplementary Figure 2. Cryo-EM map of AdhE

Atomic models were fitted in the cryo-EM map at several regions of AdhE.



## Supplementary Figure 3

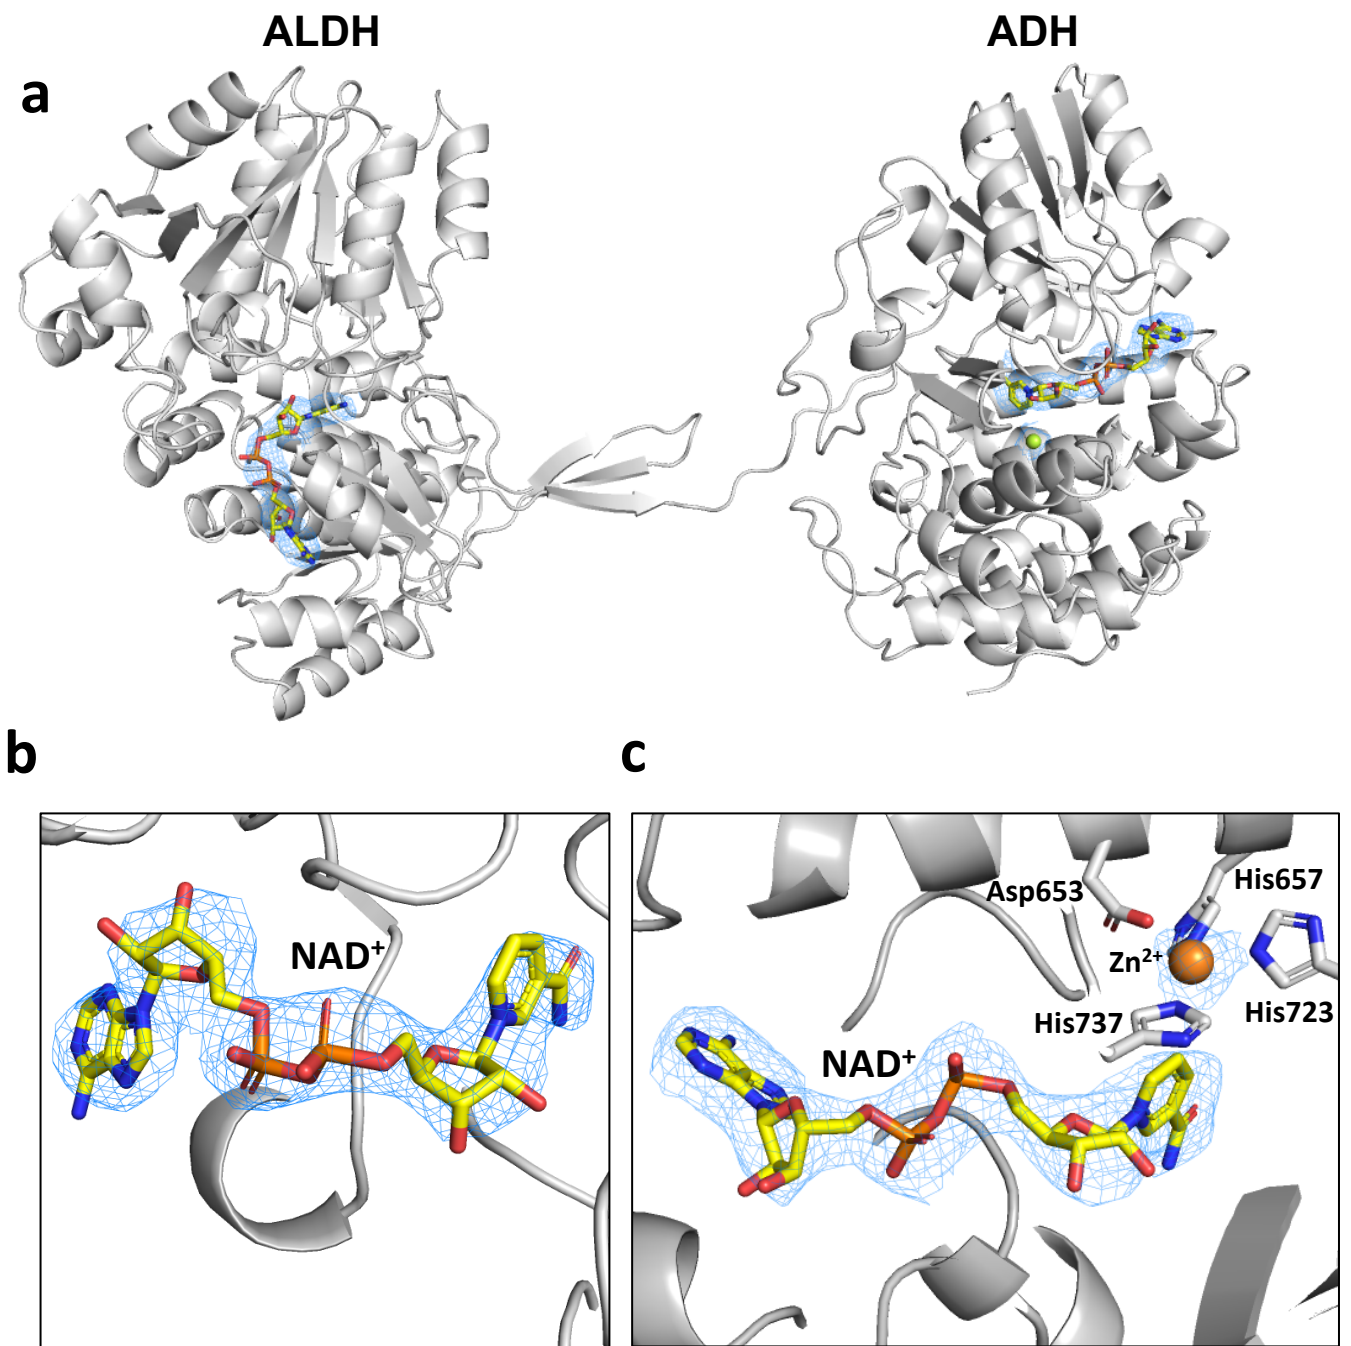

### Supplementary Figure 3. The binding of NAD<sup>+</sup> and Zn<sup>2+</sup> at the active site in the ALDH and ADH domains

**a.** The atomic model with cryo-EM maps near NAD<sup>+</sup> shows the location of the cofactor binding site. **b-c.** Cryo-EM maps near NAD<sup>+</sup> shows the configurations of NAD<sup>+</sup>s in the ALDH (**b**) and ADH (**c**) domains. Zn<sup>2+</sup> in the ADH domain is coordinated by three histidines (His657, His723 and His737) and aspartate (Asp653) (**c**).



## Supplementary Figure 4

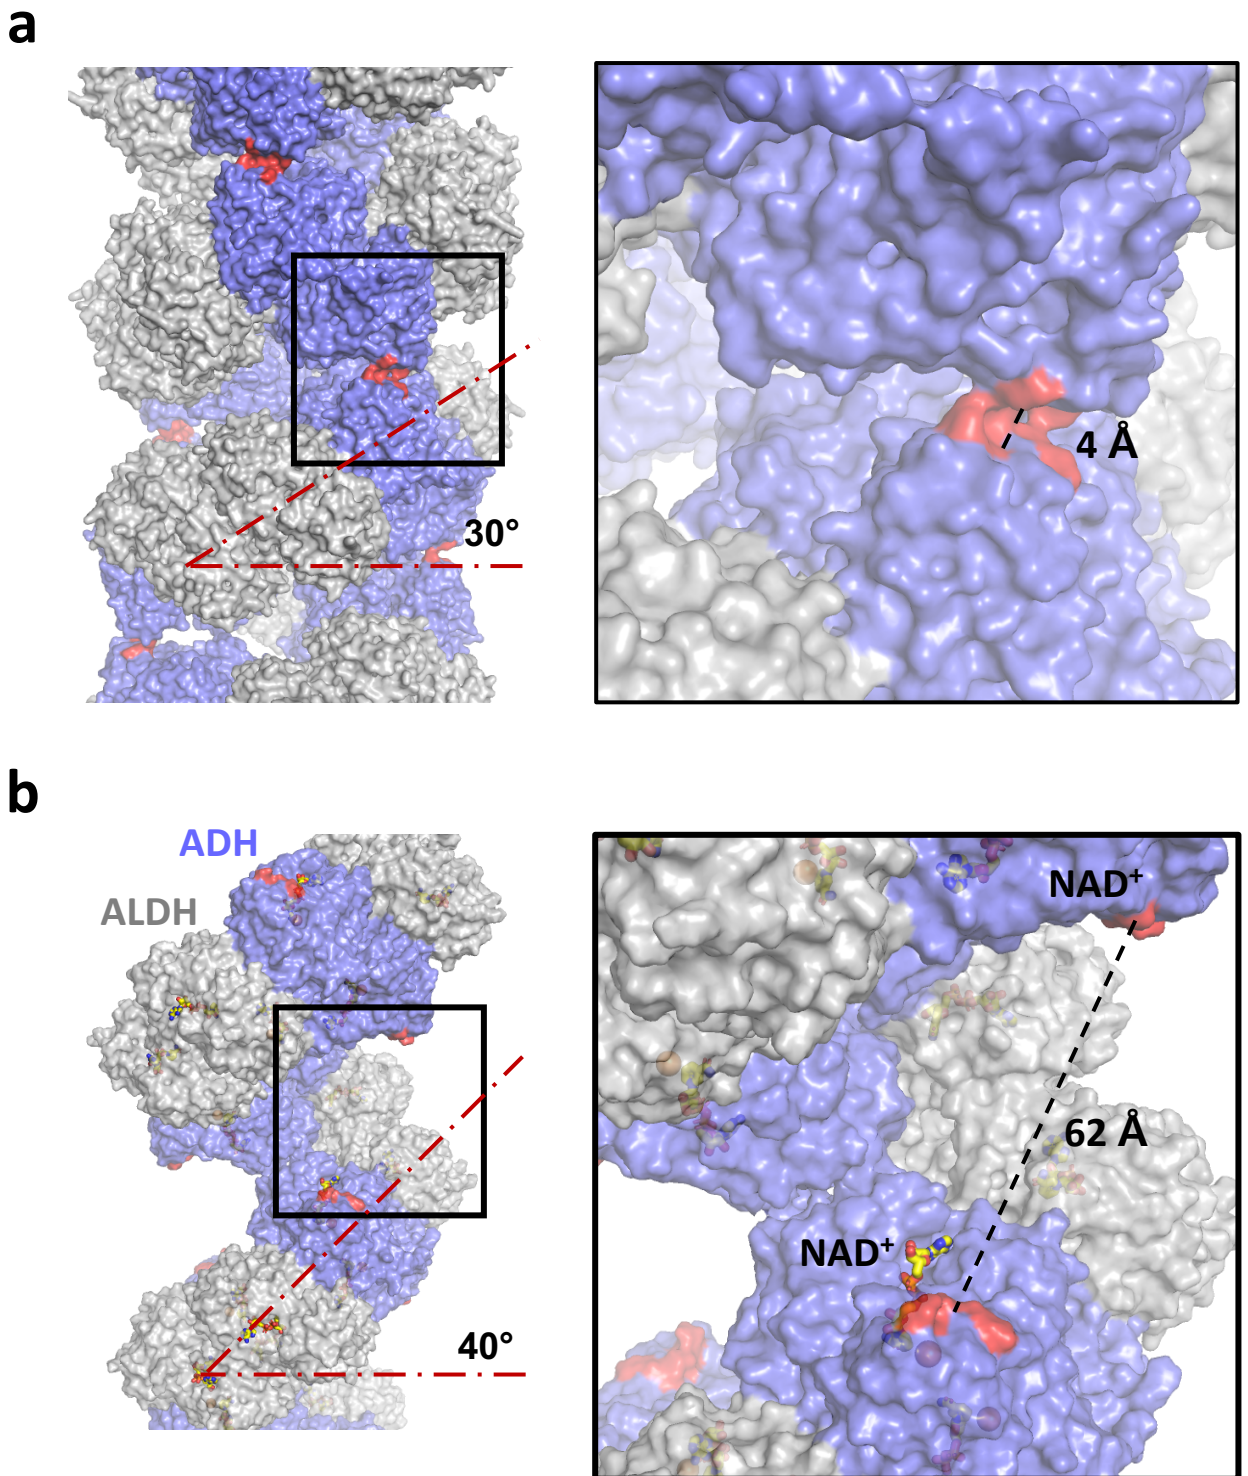

### Supplementary Figure 4. The cryo-EM structures of AdhE in compact and extended forms

The cryo-EM structures of AdhE in a compact form (a) and an extended form (b) in a surface presentation in the same view as Fig. 3. The ADH catalytic site is shown in red. In the compact form, The neighboring ADH catalytic sites are separated by only 4 Å, whereas this increases to 62 Å in the extended spiroosome. The angle of the helical turn relative to the helical axis is 30° in the compact spiroosome, while 40° in the extended form.

## Supplementary Fig. 5

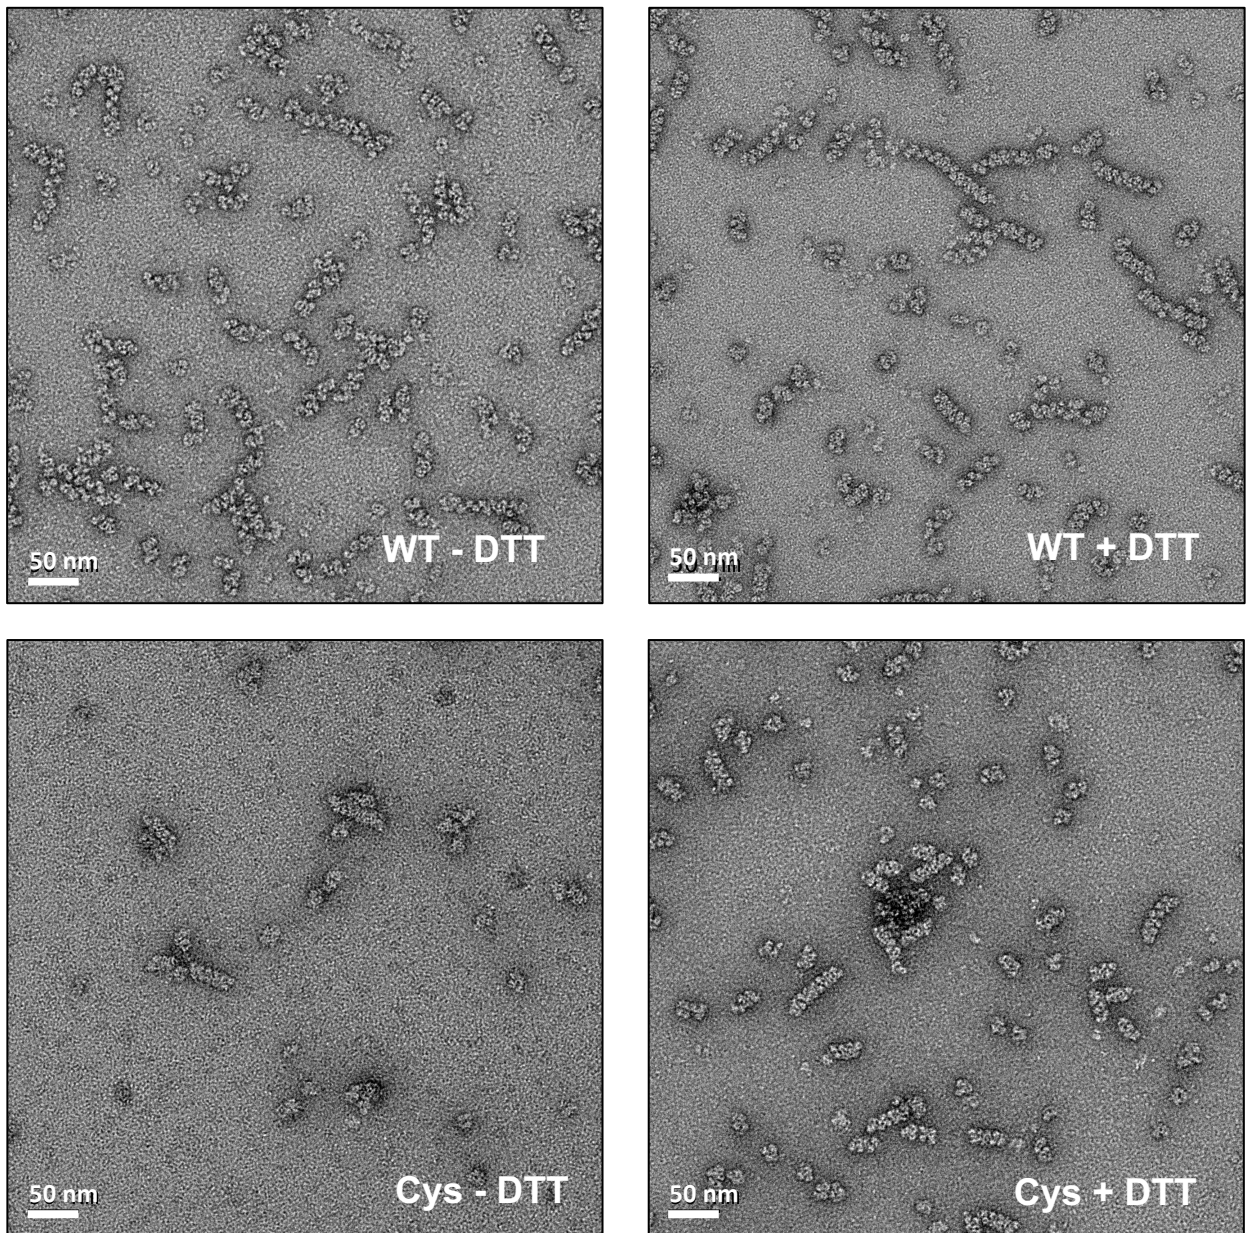

### Supplementary Fig. 5. Cryo-EM analysis of WT and Cys mutant AdhE spiroosomes in the presence and absence of reducing agent

Negative stained EM analysis of the wild-type and Cys mutant AdhE spiroosomes in the absence and presence of DTT.

## Supplementary Figure 6

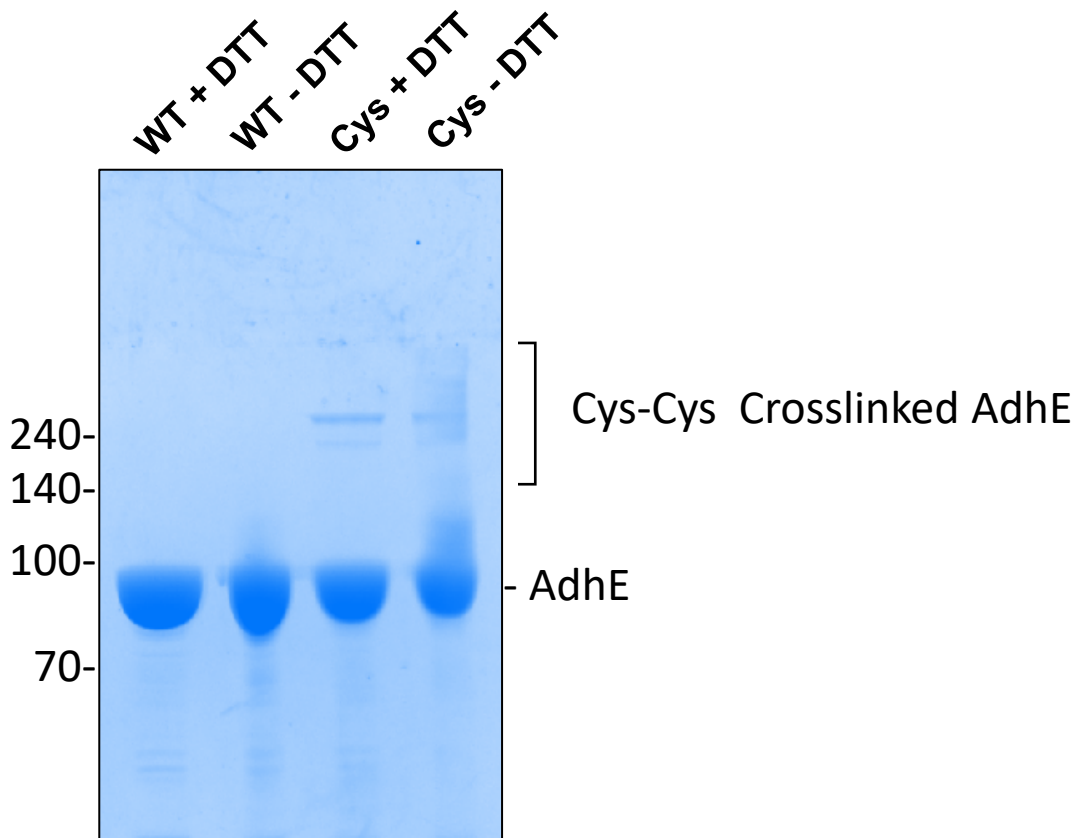

### Supplementary Figure 6. SDS-PAGE analysis of Cys-Cys crosslinked AdhE

The crosslinked AdhE mutants in the absence (-DTT) and presence (+DTT) of DTT.



**Supplementary Table 1. Refinement statistics**

|                                                  | <b>AdhE Extended Spirosome<br/>(Zn, NAD, and EtOH)</b> |
|--------------------------------------------------|--------------------------------------------------------|
| <b>Sample Preparation</b>                        |                                                        |
| Grid                                             | Quantifoil R2/2 200 mesh                               |
| Cryo-specimen freezing                           | Vitrobot IV                                            |
| <b>Data Collection</b>                           |                                                        |
| Electron Microscope                              | Talos Glacios (200 keV)                                |
| Detecting device                                 | Falcon III<br>(Electron counting mode)                 |
| Total electron exposure/used (e/Å <sup>2</sup> ) | 40.76 / 40.76                                          |
| Defocus range (μm)                               | -0.8 ~ -2.8                                            |
| Pixel size (Å <sup>2</sup> )                     | 1.14                                                   |
| <b>Processing program</b>                        |                                                        |
| Obtained / Used micrographs (no.)                | 1,704 / 743                                            |
| Initial / Final particles used (no.)             | 412,581 / 71,599                                       |
| Symmetry imposed                                 | C1                                                     |
| FSC threshold                                    | 0.143                                                  |
| <b>Resolution (Å)</b>                            | 3.43                                                   |
| <b>Refinement program</b>                        |                                                        |
|                                                  | PHENIX                                                 |
| <b>Model composition</b>                         |                                                        |
| Nonhydrogen atoms                                | 40,146                                                 |
| Protein residues                                 | 5,214                                                  |
| Zn <sup>2+</sup> / NAD <sup>+</sup>              | 6 / 12                                                 |
| <b>R.m.s. Deviation</b>                          |                                                        |
| Bond Length (Å)                                  | 0.010                                                  |
| Bond Angle (°)                                   | 0.688                                                  |
| <b>Validation</b>                                |                                                        |
| MolProbity Score                                 | 1.99                                                   |
| Clash Score                                      | 5.33                                                   |
| <b>Ramachandran Plot</b>                         |                                                        |
| Favored / Allowed (%)                            | 95.66 / 3.34                                           |
| Outliers (%)                                     | 0.00                                                   |
| <b>Mask CC</b>                                   | 0.79                                                   |
